# Supplementary material for: Direct interaction of avermectin with epidermal growth factor receptor mediates the penetration resistance in Drosophila larvae
Source: Open Biol. 2016 Apr 13;6(4):150231. doi: 10.1098/rsob.150231 (PMC4852453; doi:10.1098/rsob.150231)
Supplement: Supplementary figures [file rsob150231supp1.pdf]

## **Supplementary materials**

**Title of the MS:** Direct interaction of avermectin to EGFR mediates the penetration resistance in *Drosophila* larvae

**Authors:** Chen L-P, et al.

## Supplementary figures

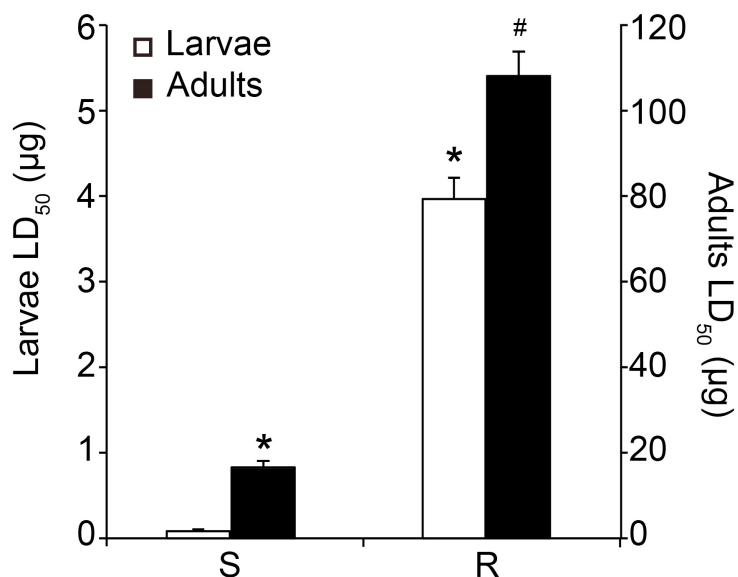

**Figure S1. The LD<sub>50</sub> of the *Drosophila* larvae and adults exposed to avermectin.** The larvae and adults were spotted with 0.25 μl avermectin and/or acetone and cultured in standard medium for 24 h. The value of LD<sub>50</sub> was calculated according to the mortality of larvae and adults exposed to different doses of avermectin (AVM) with *Probit* regression analysis. Data were expressed as mean ± SEM, \*P < 0.01, #P < 0.01, compared to the corresponding S control group. n=3. S and R are short for AVM-susceptible strain and AVM-resistant strain, respectively.

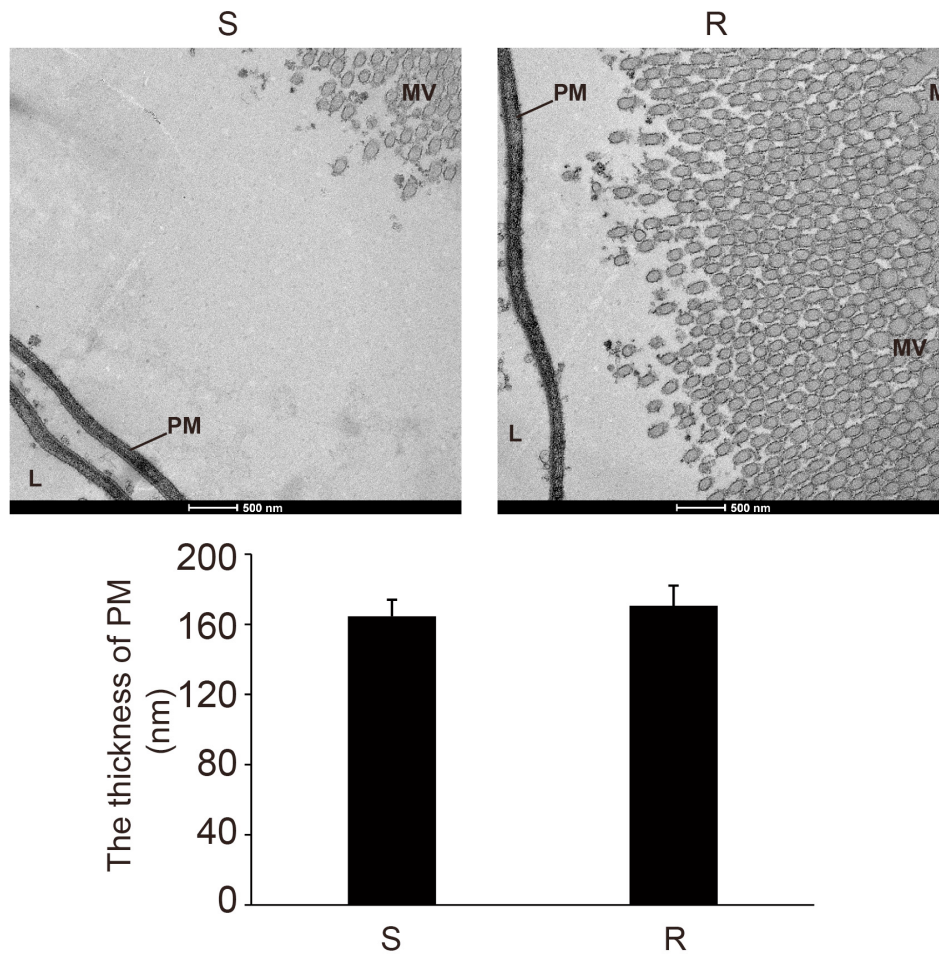

**Figure S2. The peritrophic membranes in the midgut of the *Drosophila* larvae.** (A) Section through the peritrophic membranes (PM) surrounded by the microvillar brush border (MV) and luminal (L). (B) The thickness of PM determined by electronic microscope. S and R are short for avermectin-susceptible strain and avermectin-resistant strain, respectively.

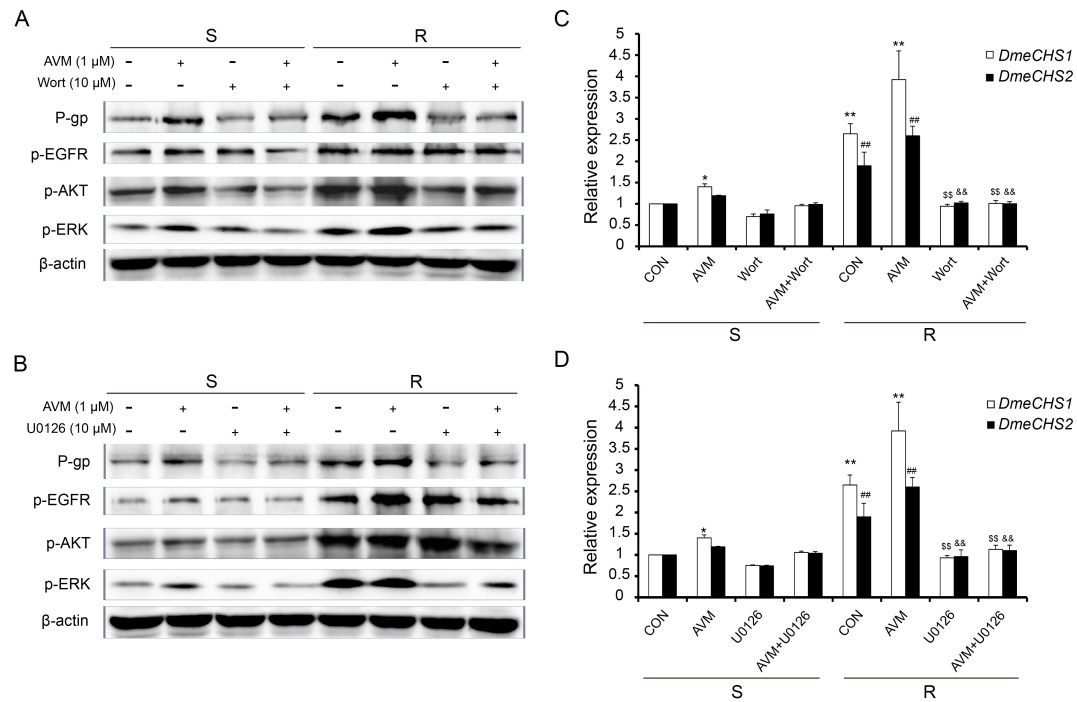

**Figure S3. Expression of P-gp and DmeCHS1/2 is regulated by EGFR/AKT/ERK signaling pathway.** The S and R *Drosophila* larvae were treated with avermectin (AVM), wortmanin (Wort) or U0126 for 48 h. (A-B) The protein levels of P-gp, p-EGFR, p-AKT, and p-ERK in larvae treated with AVM and wortmanin (A), or U0126 (B) were determined by Western blotting analysis. (C-D) The mRNA levels of *DmeCHS2* and *DmeCHS1* in larvae treated with AVM and wortmanin (C), or U0126 (D) were determined by qPCR analysis with  $\beta$ -actin as the internal control. Data were expressed as mean  $\pm$  SEM, \* $P$  < 0.05, \*\* $P$  < 0.01, # $P$  < 0.05, ## $P$  < 0.01, compared to the corresponding S control group; \$ $P$  < 0.05, \$\$ $P$  < 0.01, & $P$  < 0.05, && $P$  < 0.01, compared to the corresponding R control group;  $n$  = 3. CON, S, R, and Wort are short for control, AVM-susceptible strain, AVM-resistant strain, and wortmanin, respectively.

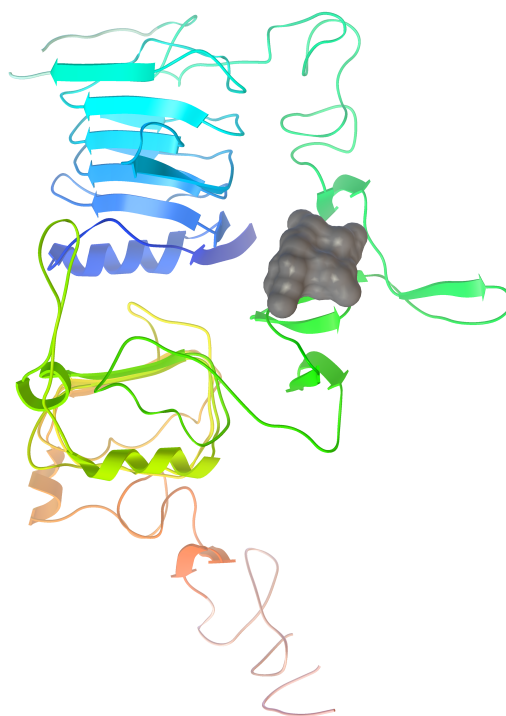

**Figure S4. Docking model of the avermectin binding to EGFR.**

Ribbon representation of the ectodomain of *Drosophila* EGFR, with domain I colored blue, domain II green, domain III yellow, and domain IV red. Space-filling representation of avermectin B1a is colored gray.

## Supplementary table

**Table S1 List of primers used in the study**

| <b>Primers for production of dsRNA</b>           |                                                   |
|--------------------------------------------------|---------------------------------------------------|
| EGFRATPbi-F                                      | GAATTAATACGACTCACTATAGGGAGAGGCTCTAAGGCTCTGCTCAACT |
| EGFRATPbi-R                                      | GAATTAATACGACTCACTATAGGGAGATTGGGTATCTCATCCGTGC    |
| Mdr49ATPbi-F                                     | GAATTAATACGACTCACTATAGGGAGAAGGGCATAACGCTTCCGTTA   |
| Mdr49ATPbi-R                                     | GAATTAATACGACTCACTATAGGGAGACCAGTTCGCAGTAGAGACCA   |
| Mdr50ATPbi-F                                     | GAATTAATACGACTCACTATAGGGAGATGGCTCTTGTTGGTCCAT     |
| Mdr50ATPbi-R                                     | GAATTAATACGACTCACTATAGGGAGACTCTTCCTCATCTTCATCCTTG |
| Mdr65ATPbi-F                                     | GAATTAATACGACTCACTATAGGGAGAGGTTCTTCTGGCTGTGGAA    |
| Mdr65ATPbi-R                                     | GAATTAATACGACTCACTATAGGGAGACGTCTCAAAGGATTTCTCAAAC |
| <b>Primers for Fluorescence Quantitative PCR</b> |                                                   |
| DmeCHS2-F                                        | GGAGGAGACTACGATAGCGGTGAC                          |
| DmeCHS2-R                                        | GCGAAGACAAGGAGGTAGGTGC                            |
| DmeCHS1-F                                        | AACAAAGACTTGGGTCTGGGACA                           |
| DmeCHS1-R                                        | CCATCAGCCAGACGAAGAGGA                             |
| β-actin-F                                        | CGTCCGTGACATCAAGGAGAAGC                           |
| β-actin-R                                        | CCAAGAACGAGGGCTGGAACA                             |
| <b>Primers for Reverse Transcription PCR</b>     |                                                   |
| DmeCHS2-F                                        | GCAGCCCCACAATGACAGG                               |
| DmeCHS2-R                                        | CCTCATCCAAGCGGACAAT                               |
| DmeCHS1-F                                        | GCCAACGCACCATACAAGAGACG                           |
| DmeCHS1-R                                        | CTGGGGCAGAACCACGAACATCA                           |
| β-actin-F                                        | ACCGAGGCCCCGCTGAACCCCAAGG                         |
| β-actin-R                                        | AGAACGAGGGCTGGAACA                                |
